# Supplementary material
Source: PubMed Central journal article supplement (PMC10991431)
Supplement: 262_2021_3125_MOESM1_ESM.pdf [file 262_2021_3125_MOESM1_ESM.pdf]

## Supplemental Figure 1

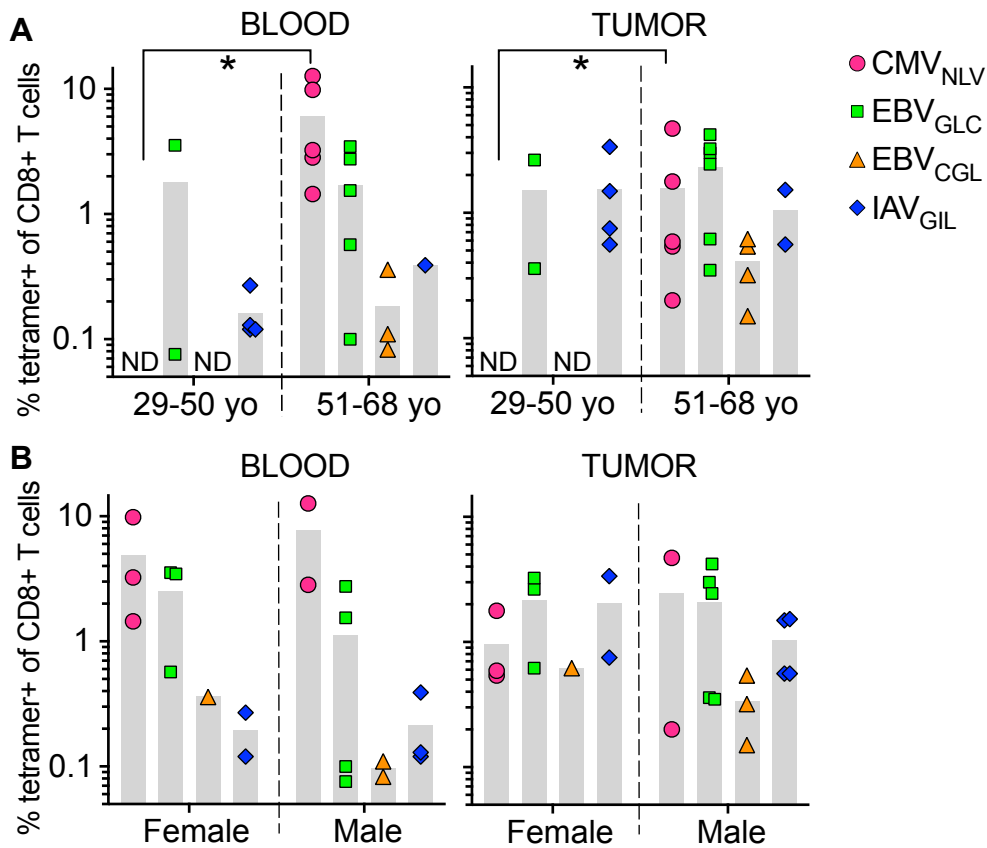

**Supplemental Figure 1.** Glioblastoma tumors and paired blood were stained for HLA-A\*02+ tetramers specific for EBV (EBV<sub>GLC</sub> and EBV<sub>CLG</sub>), CMV (CMV<sub>NLV</sub>), and Influenza A virus (IAV<sub>GIL</sub>). The frequency (%) of tetramer-positive populations out of CD8+/CD3+ T cells in blood and glioblastoma tumors stratified by patient age (**A**) and sex (**B**). **A**) Patients stratified as 29-50 years of age (n=5) or 51-68 years of age (n=7). **B**) Patients stratified by sex (n=6 female, n=6 male). Pink circle, CMV<sub>NLV</sub>; green square, EBV<sub>GLC</sub>; orange triangle, EBV<sub>CLG</sub>; blue diamond IAV<sub>GIL</sub>. Data reflective of Figure 1B and Supplemental Table 1. ND=not detected. Significance was determined by Chi-squared testing for the proportion of patients with tetramer+ cells; \* p<0.05.
