# Supplementary material
Source: PubMed Central journal article supplement (PMC10991431)
Supplement: 262_2021_3125_MOESM2_ESM.pdf [file 262_2021_3125_MOESM2_ESM.pdf]

| Patient ID                                                          | Age | Sex | tissue | %CMV <sub>NLV</sub> | %EBV <sub>GLC</sub> | %EBV <sub>CLG</sub> | %IAV <sub>GIL</sub> |
|---------------------------------------------------------------------|-----|-----|--------|---------------------|---------------------|---------------------|---------------------|
| T17_1298                                                            | 35  | M   | blood  | ND                  | 0.076               | ND                  | 0.12                |
|                                                                     |     |     | tumor  | ND                  | 0.36                | ND                  | 1.49                |
| T18_0128                                                            | 48  | M   | blood  | ND                  | 0.036               | 0.033               | 0.13                |
|                                                                     |     |     | tumor  | ND                  | •                   | •                   | 0.56                |
| T18_0350                                                            | 53  | M   | blood  | ND                  | 2.75                | 0.083               | •                   |
|                                                                     |     |     | tumor  | ND                  | 3                   | 0.54                | 0.56                |
| T18_0566                                                            | 57  | M   | blood  | 2.84                | 0.055               | •                   | •                   |
|                                                                     |     |     | tumor  | 0.2                 | 0.35                | 0.15                | •                   |
| T18_0137                                                            | 68  | M   | blood  | 12.7                | 1.54                | 0.11                | 0.39                |
|                                                                     |     |     | tumor  | 4.71                | 4.2                 | 0.32                | 1.53                |
| T18_0929                                                            | 62  | M   | blood  | •                   | •                   | •                   | •                   |
|                                                                     |     |     | tumor  | •                   | 2.44                | •                   | •                   |
| T18_0969                                                            | 29  | F   | blood  | •                   | •                   | •                   | 0.27                |
|                                                                     |     |     | tumor  | •                   | •                   | •                   | 0.75                |
| T19_0158                                                            | 49  | F   | blood  | •                   | 3.54                | •                   | •                   |
|                                                                     |     |     | tumor  | x                   | 2.64                | x                   | x                   |
| T18_0358                                                            | 49  | F   | blood  | ND                  | ND                  | ND                  | 0.12                |
|                                                                     |     |     | tumor  | ND                  | ND                  | ND                  | 3.37                |
| T19_0164                                                            | 61  | F   | blood  | 1.45                | 0.57                | ND                  | ND                  |
|                                                                     |     |     | tumor  | 0.54                | 0.62                | x                   | x                   |
| T19_0175                                                            | 67  | F   | blood  | 3.25                | 3.46                | •                   | •                   |
|                                                                     |     |     | tumor  | 0.59                | 3.24                | x                   | x                   |
| T18_0769                                                            | 68  | F   | blood  | 9.86                | ND                  | 0.36                | ND                  |
|                                                                     |     |     | tumor  | 1.78                | ND                  | 0.62                | ND                  |
| ND = not detected                                                   |     |     |        |                     |                     |                     |                     |
| X = data not collected                                              |     |     |        |                     |                     |                     |                     |
| • = not enough CD8+ T cells acquired to get an accurate measurement |     |     |        |                     |                     |                     |                     |

**Supplemental Table 1.** Patient information pertaining to Figure 1 and Supplemental Figure 1. Patient ID, age and sex are detailed along with corresponding frequency of HLA-A\*02 tetramer+ cells out of total CD8+ T cells.
